# Supplementary material for: Assessing the spatial correlation of potential compound flooding in the United States
Source: Copernicus journal article supplement (doi:10.5194/egusphere-2025-2993), 2025-07-07
Supplement: Supplementary file 1 [file egusphere-2025-2993-supplement.pdf]

*Supplement of*  
**Assessing the spatial correlation of potential compound flooding in  
the United States**

**Huazhi Li et al.**

5 *Correspondence to:* Huazhi Li (huazhi.li@vu.nl)

**Table S1: Summary of location information for the 41 station combinations of NOAA tidal gauges and USGS river stations**

| <b>Coast</b> | <b>Location number</b> | <b>Tidal Gauge</b> | <b>Lat</b> | <b>Long</b> | <b>River Station</b>    | <b>USGS Station Number</b> | <b>Lat</b> | <b>Long</b> | <b>Distance Between Paired Stations (km)</b> |
|--------------|------------------------|--------------------|------------|-------------|-------------------------|----------------------------|------------|-------------|----------------------------------------------|
| West         | 1                      | Friday Harbor      | 48.5       | -123.0      | Nooksack River          | 12213100                   | 48.8       | -122.6      | 44.5                                         |
|              | 2                      | Seattle            | 47.6       | -122.3      | Green River             | 12113000                   | 47.3       | -122.2      | 34.2                                         |
|              | 3                      | Toke Point         | 46.7       | -124.0      | Willapa River           | 12013500                   | 46.7       | -123.7      | 22.9                                         |
|              | 4                      | Astoria            | 46.2       | -123.8      | Cowlitz River           | 14243000                   | 46.3       | -122.9      | 70.1                                         |
|              | 5                      | South Beach        | 44.6       | -124.0      | Siletz River            | 14305500                   | 44.7       | -123.9      | 13.6                                         |
|              | 6                      | Charleston 2       | 43.3       | -124.3      | Umpqua River            | 14321000                   | 43.6       | -123.6      | 65.6                                         |
|              | 7                      | Crescent City      | 41.7       | -124.2      | Klamath River           | 11530500                   | 41.5       | -124.0      | 27.8                                         |
|              | 8                      | North Spit         | 40.8       | -124.2      | Mad River               | 11481000                   | 40.9       | -124.1      | 13.9                                         |
|              | 9                      | San Francisco      | 37.8       | -122.5      | Castro Valley Channel   | 11181008                   | 37.7       | -122.1      | 34.3                                         |
|              | 10                     | Port San Luis      | 35.2       | -120.8      | Cuyama River            | 11136800                   | 35.0       | -120.2      | 55.7                                         |
|              | 11                     | Santa Monica       | 34.0       | -118.5      | Rio Hondo               | 11101250                   | 34.1       | -118.1      | 40.0                                         |
|              | 12                     | Los Angeles        | 33.7       | -118.3      | San Gabriel River       | 11087020                   | 34.0       | -118.0      | 43.4                                         |
|              | 13                     | La Jolla           | 32.9       | -117.3      | Los Penasquitos Channel | 11023340                   | 32.9       | -117.1      | 17.3                                         |
| Gulf         | 14                     | Rock Port          | 28.0       | -97.0       | Mission River           | 08189500                   | 28.3       | -97.3       | 44.5                                         |
|              | 15                     | Pier 21            | 29.3       | -94.8       | Whiteoak Bayou          | 08074500                   | 29.8       | -95.4       | 80.4                                         |
|              | 16                     | Pensacola          | 30.4       | -87.2       | Escambia River          | 02375500                   | 31.0       | -87.2       | 61.7                                         |
|              | 17                     | Panama City        | 30.2       | -85.7       | Choctawhatchee River    | 02366500                   | 30.5       | -85.9       | 33.7                                         |
|              | 18                     | Apalachicola       | 29.7       | -85.0       | Apalachicola River      | 02359170                   | 29.9       | -85.0       | 22.2                                         |
|              | 19                     | Cedar Key          | 29.1       | -83.0       | Suwannee River          | 02323500                   | 29.6       | -82.9       | 56.4                                         |
|              | 20                     | St Petersburg      | 27.8       | -82.6       | Little Manatee River    | 02300500                   | 27.7       | -82.4       | 22.6                                         |
| East         | 21                     | Fernandina Beach   | 30.7       | -81.5       | Saint Marys River       | 02231000                   | 30.4       | -82.1       | 66.4                                         |
|              | 22                     | Fort Pulaski       | 32.0       | -80.9       | Savannah River          | 02198500                   | 32.5       | -81.3       | 67.1                                         |
|              | 23                     | Charleston         | 32.8       | -79.9       | Edisto River            | 02175000                   | 33.0       | -80.4       | 51.7                                         |
|              | 24                     | Wilmington         | 34.2       | -78.0       | Cape Fear River         | 02105769                   | 34.4       | -78.3       | 34.0                                         |
|              | 25                     | Beaufort           | 34.7       | -76.7       | Neuse River             | 02091814                   | 35.3       | -77.3       | 86.2                                         |
|              | 26                     | Duck               | 36.2       | -75.7       | Blackwater River        | 02049500                   | 36.8       | -76.9       | 126.3                                        |
|              | 27                     | Sewell point       | 36.9       | -76.3       | James River             | 02037500                   | 37.6       | -77.5       | 131.7                                        |
|              | 28                     | Washington         | 38.9       | -77.0       | Potomac River           | 01646500                   | 38.9       | -77.1       | 8.7                                          |
|              | 29                     | Baltimore          | 39.3       | -76.6       | Susquehanna River       | 01578310                   | 39.7       | -76.7       | 40.5                                         |
|              | 30                     | Annapolis          | 39.0       | -76.5       | Patuxent River          | 01594440                   | 39.0       | -76.7       | 18.2                                         |
|              | 31                     | Reedy Point        | 39.6       | -75.6       | Brandywine Creek        | 01481500                   | 39.8       | -75.6       | 22.2                                         |
|              | 32                     | Atlantic City      | 39.4       | -74.4       | Tuckahoe River          | 01411300                   | 39.6       | -74.4       | 22.2                                         |
|              | 33                     | Sandy Hook         | 40.5       | -74.0       | Swimming River          | 01407500                   | 40.3       | -74.1       | 22.3                                         |

|  |    |             |      |       |                  |          |      |       |      |
|--|----|-------------|------|-------|------------------|----------|------|-------|------|
|  | 34 | Battery     | 40.7 | -74.0 | Saddle River     | 01391500 | 40.9 | -74.1 | 23.8 |
|  | 35 | Bridge Port | 41.2 | -73.2 | Housatonic River | 01205500 | 41.4 | -73.2 | 22.2 |
|  | 36 | New London  | 41.4 | -72.1 | Shetucket River  | 01122500 | 41.7 | -72.2 | 34.4 |
|  | 37 | Newport     | 41.5 | -71.3 | Pawtuxet River   | 01116500 | 41.8 | -71.4 | 30.1 |
|  | 38 | Boston      | 42.4 | -71.1 | Charles River    | 01104500 | 42.4 | -71.2 | 8.2  |
|  | 39 | Portland    | 43.7 | -70.2 | Saco River       | 01066000 | 43.8 | -70.8 | 49.5 |
|  | 40 | Bar Harbor  | 44.4 | -68.2 | Penobscot River  | 01034500 | 45.2 | -68.7 | 99.6 |
|  | 41 | Eastport    | 44.9 | -67.0 | St. Croix River  | 01021000 | 45.1 | -67.3 | 32.4 |

**Table S2: Summary of information on the marginal thresholds and specified thresholds used for identifying compound flooding potential**

| Location number | Tidal Gauge      | River Station           | Marginal threshold |                               | Compound threshold (99th) |                               |
|-----------------|------------------|-------------------------|--------------------|-------------------------------|---------------------------|-------------------------------|
|                 |                  |                         | Water level (m)    | Discharge (m <sup>3</sup> /s) | Water level (m)           | Discharge (m <sup>3</sup> /s) |
| 1               | Friday Harbor    | Nooksack River          | 4.09 (98.5)        | 210.39 (92.0)                 | 4.13                      | 450.24                        |
| 2               | Seattle          | Green River             | 6.31 (95.2)        | 162.82 (98.1)                 | 6.49                      | 212.16                        |
| 3               | Toke Point       | Willapa River           | 4.53 (91.5)        | 83.53 (96.5)                  | 4.91                      | 146.54                        |
| 4               | Astoria          | Cowlitz River           | 3.36 (90.7)        | 504.04 (91.6)                 | 3.69                      | 911.8                         |
| 5               | South Beach      | Siletz River            | 4.34 (90.3)        | 99.68 (90.0)                  | 4.64                      | 283.17                        |
| 6               | Charleston 2     | Umpqua River            | 3.82 (90.5)        | 1266.68 (98.7)                | 4.11                      | 1434.25                       |
| 7               | Crescent City    | Klamath River           | 3.51 (91.9)        | 2732.58 (98.7)                | 3.76                      | 2944.95                       |
| 8               | North Spit       | Mad River               | 6.97 (92.0)        | 106.58 (90.4)                 | 7.18                      | 343.34                        |
| 9               | San Francisco    | Castro Valley Channel   | 4.04 (98.3)        | 0.96 (97.6)                   | 4.08                      | 1.81                          |
| 10              | Port San Luis    | Cuyama River            | 3.38 (97.9)        | 3.33 (97.1)                   | 3.43                      | 12.74                         |
| 11              | Santa Monica     | Rio Hondo               | 2.94 (98.6)        | 8.19 (95.6)                   | 2.96                      | 29.8                          |
| 12              | Los Angeles      | San Gabriel River       | 3.33 (97.3)        | 13.28 (95.8)                  | 3.39                      | 76.81                         |
| 13              | La Jolla         | Los Penasquitos Channel | 3.4 (96.4)         | 4.15 (98.4)                   | 3.49                      | 6.45                          |
| 14              | Rock Port        | Mission River           | 2.46 (94.7)        | 80.09 (98.9)                  | 2.6                       | 87.07                         |
| 15              | Pier 21          | Whiteoak Bayou          | 2.23 (94.3)        | 56.63 (98.9)                  | 2.41                      | 59.75                         |
| 16              | Pensacola        | Escambia River          | 3.4 (97.4)         | 368.12 (90.1)                 | 3.56                      | 996.75                        |
| 17              | Panama City      | Choctawhatchee River    | 1.89 (98.6)        | 447.07 (93.2)                 | 1.91                      | 962.77                        |
| 18              | Apalachicola     | Apalachicola River      | 2.28 (98.3)        | 1180.81 (90.7)                | 2.33                      | 2368.87                       |
| 19              | Cedar Key        | Suwannee River          | 2.19 (97.2)        | 540.85 (92.6)                 | 2.27                      | 914.63                        |
| 20              | St Petersburg    | Little Manatee River    | 2.09 (96.1)        | 10.34 (90.1)                  | 2.19                      | 39.08                         |
| 21              | Fernandina Beach | Saint Marys River       | 3.09 (98.7)        | 38.51 (90.3)                  | 3.11                      | 144.13                        |
| 22              | Fort Pulaski     | Savannah River          | 3.99 (98.9)        | 1125.59 (99.0)                | 4                         | 1125.59                       |
| 23              | Charleston       | Edisto River            | 3.2 (98.7)         | 298.25 (98.7)                 | 3.22                      | 311.49                        |
| 24              | Wilmington       | Cape Fear River         | 2.59 (96.2)        | 504.04 (94.6)                 | 2.7                       | 725.62                        |

|    |               |                   |             |                |      |         |
|----|---------------|-------------------|-------------|----------------|------|---------|
| 25 | Beaufort      | Neuse River       | 2.09 (97.4) | 302.99 (92.7)  | 2.15 | 591.82  |
| 26 | Duck          | Blackwater River  | 7.19 (91.3) | 46.16 (90.3)   | 7.44 | 114.75  |
| 27 | Sewell point  | James River       | 2.56 (90.1) | 458.73 (90.0)  | 2.88 | 1365.58 |
| 28 | Washington    | Potomac River     | 2.92 (98.3) | 923.13 (92.3)  | 2.97 | 2331.18 |
| 29 | Baltimore     | Susquehanna River | 2.32 (98.8) | 2772.22 (92.6) | 2.33 | 5889.9  |
| 30 | Annapolis     | Patuxent River    | 2.37 (98.6) | 30.58 (94.2)   | 2.4  | 71.43   |
| 31 | Reedy Point   | Brandywine Creek  | 2.65 (97.5) | 32.0 (93.6)    | 2.72 | 81.91   |
| 32 | Atlantic City | Tuckahoe River    | 3.5 (97.7)  | 2.21 (90.8)    | 3.59 | 4.93    |
| 33 | Sandy Hook    | Swimming River    | 3.01 (98.5) | 3.06 (90.5)    | 3.06 | 13.39   |
| 34 | Battery       | Saddle River      | 3.2 (98.9)  | 5.72 (90.4)    | 3.21 | 19.16   |
| 35 | Bridge Port   | Housatonic River  | 3.38 (97.5) | 201.74 (94.2)  | 3.47 | 379.45  |
| 36 | New London    | Shetucket River   | 2.42 (96.3) | 54.65 (92.1)   | 2.54 | 119.78  |
| 37 | Newport       | Pawtuxet River    | 2.28 (98.3) | 21.72 (90.0)   | 2.31 | 48.21   |
| 38 | Boston        | Charles River     | 4.9 (98.4)  | 20.78 (90.4)   | 4.94 | 39.64   |
| 39 | Portland      | Saco River        | 6.23 (97.4) | 170.18 (90.0)  | 6.31 | 382.28  |
| 40 | Bar Harbor    | Penobscot River   | 5.16 (97.1) | 763.0 (90.2)   | 5.24 | 1722.37 |
| 41 | Eastport      | St. Croix River   | 8.35 (98.7) | 144.13 (90.3)  | 4.13 | 450.24  |

*\*numbers in the brackets showing the corresponding marginal quantile*

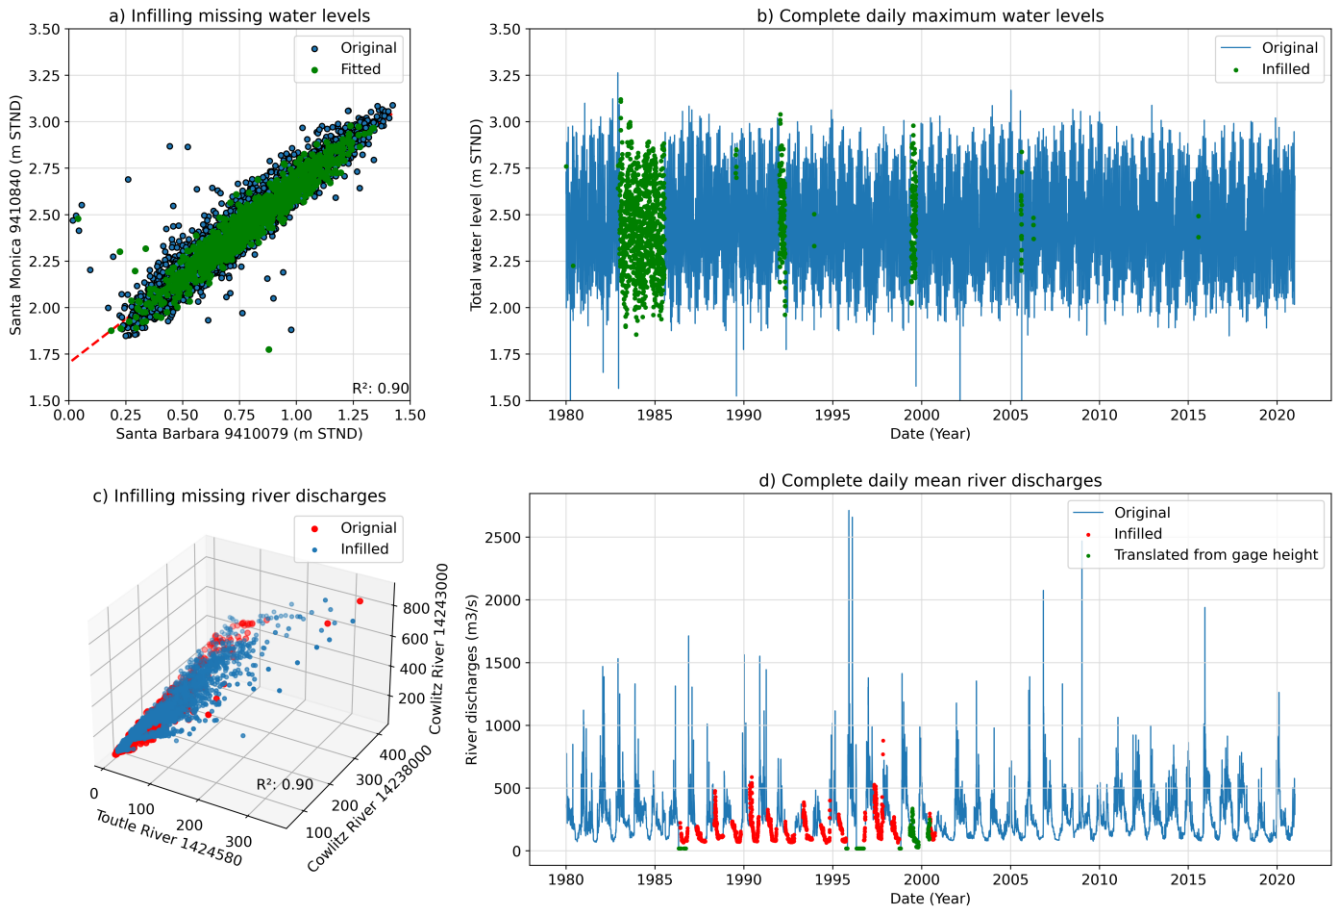

**Figure S1:** Exemplary infilling results for the tidal gauge Santa Monica and the river station Cowlitz River. Panel a) shows the infilled water levels from the simultaneous values at the gauge Santa Barbara, while Panel b) shows the complete time series after infilling. Panel c) shows the infilled daily mean discharges from the simultaneous data at two upstream river stations and Panel d) shows the complete time series after the infilling process.

### Section S1: Evaluation of the sampled historic spatially joint events of total water level and river discharge

Two measures are applied to evaluate these spatially joint events. First, we assess how many de-clustered peaks are captured, missed or double counted per variable in the sampled events. Fig. S1 shows that these identified joint events can sufficiently capture the de-clustered peaks. While only very few peaks are doubled counted, these events are found to miss a certain amount of peaks. This is probably due to the applied window for time lags between locations is relatively long, during which only the maximum peak is retained.

The second evaluation analysis is done by assessing the number of extremes as well as non-extremes including true and false non-extremes for each variable from all sampled events. We define extremes of individual variables using the corresponding 99<sup>th</sup> thresholds. True non-extremes are the sampled values below this threshold, while false non-extremes refer to those

above the threshold but they are not the identified peaks. The false non-extremes are the cases where the variable value exceeds the threshold but is not one of the de-clustered peaks. False non-extremes are sampled when the peak of a particular variable falls outside the lag window of the peak of the primary variable. Evaluation results can be found in Fig. S2. The numbers of sampled historic events are the same for the Gulf and East coasts as the model was applied for a large area combining these two coasts.

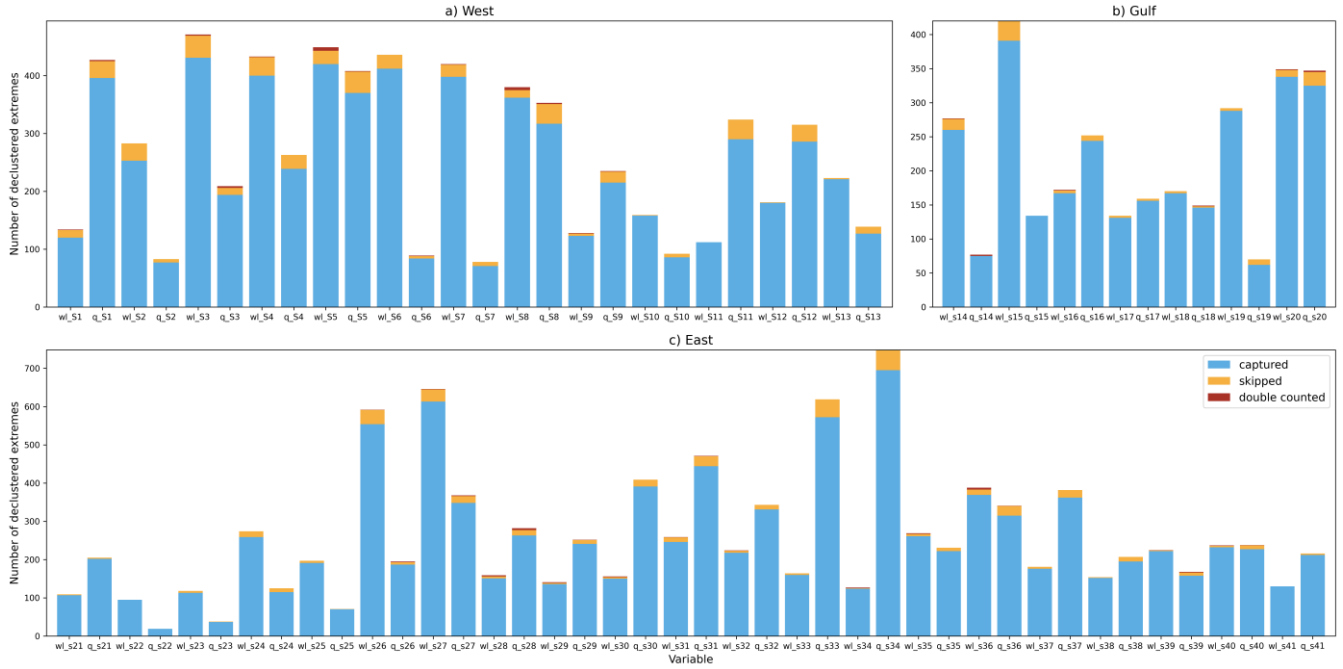

**Figure S2:** Evaluation of the sampled historic spatially joint events. The numbers of captured, skipped, and double counted peaks for the West, Gulf, and East coasts are represented by the blue, yellow, and red bars, respectively. The location numbers correspond to those in Table S1.

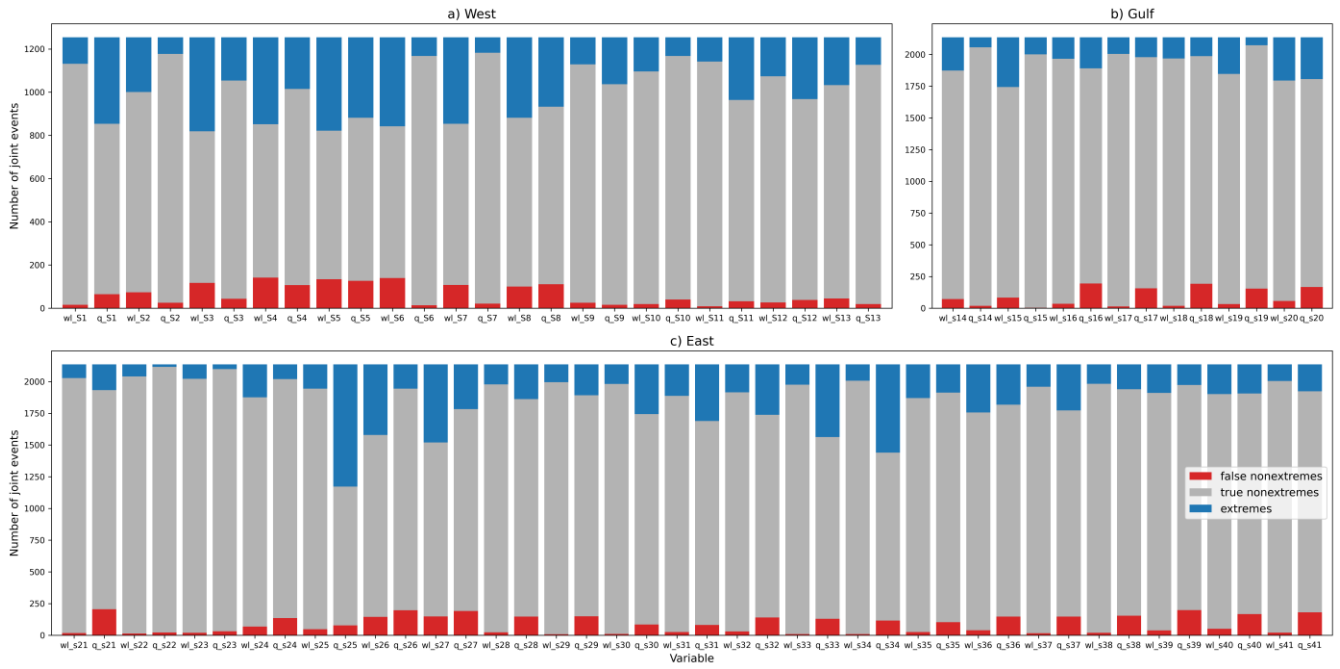

**Figure S3:** Evaluation of the sampled historic spatially joint events. The numbers of extremes, true non-extremes, false non-extremes in the sampled joint events for the West, Gulf, and East coasts are represented by the blue, grey, and red bars, respectively. The location numbers correspond to those in Table S1.

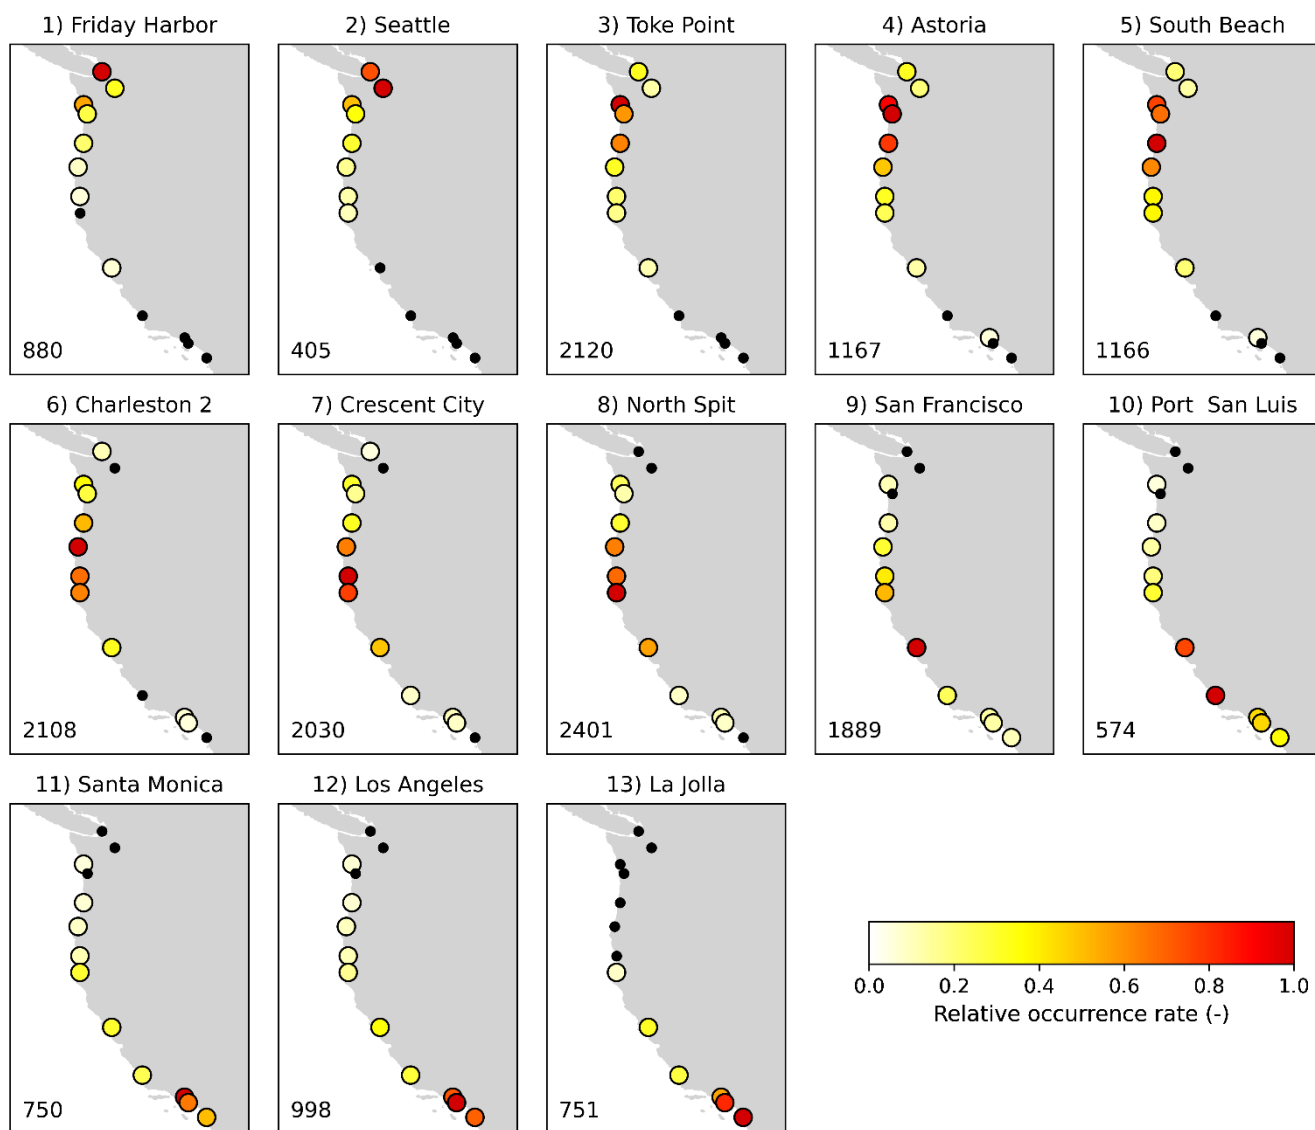

**Figure S4:** Joint occurrence rate of potential compound flooding at remaining locations given potential compound flooding occurs at a primary location for the West coast. Potential compound flooding is defined by events with both total water levels and river discharges exceeding the 1-year return level. Small black solid circles refer to the joint occurrence rate lower than 0.05.



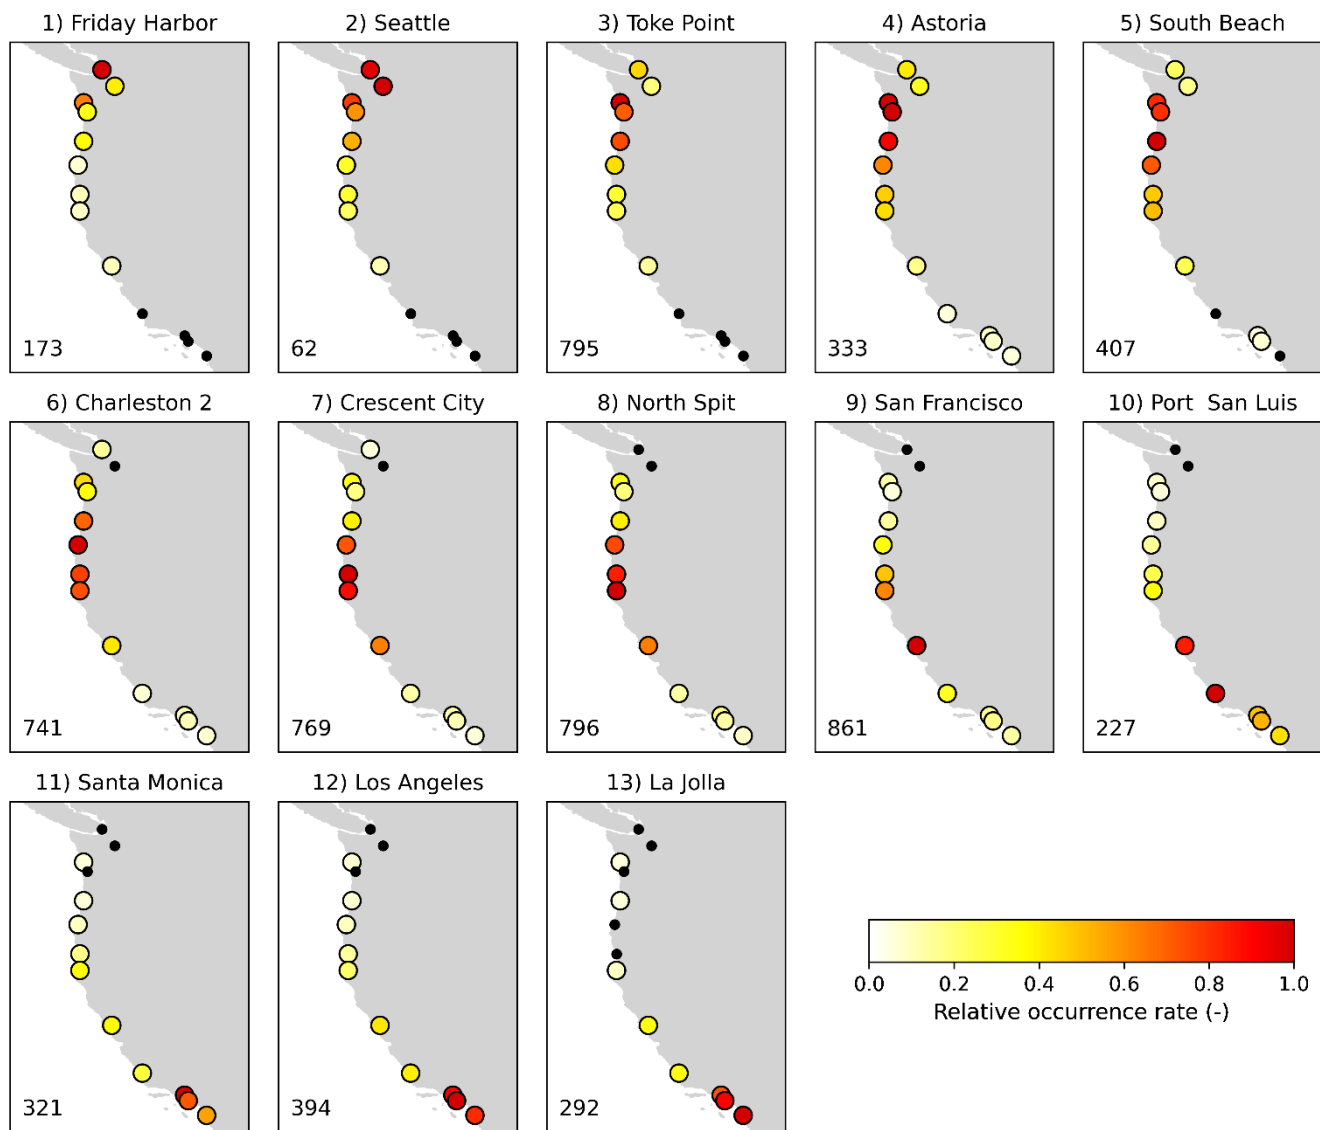

45 **Figure S5:** Joint occurrence rate of potential compound flooding at remaining locations given potential compound flooding occurs at a primary location for the West coast. Potential compound flooding is defined by events with both total water levels and river discharges exceeding the 2-year return level. Small black solid circles refer to the joint occurrence rate lower than 0.05.

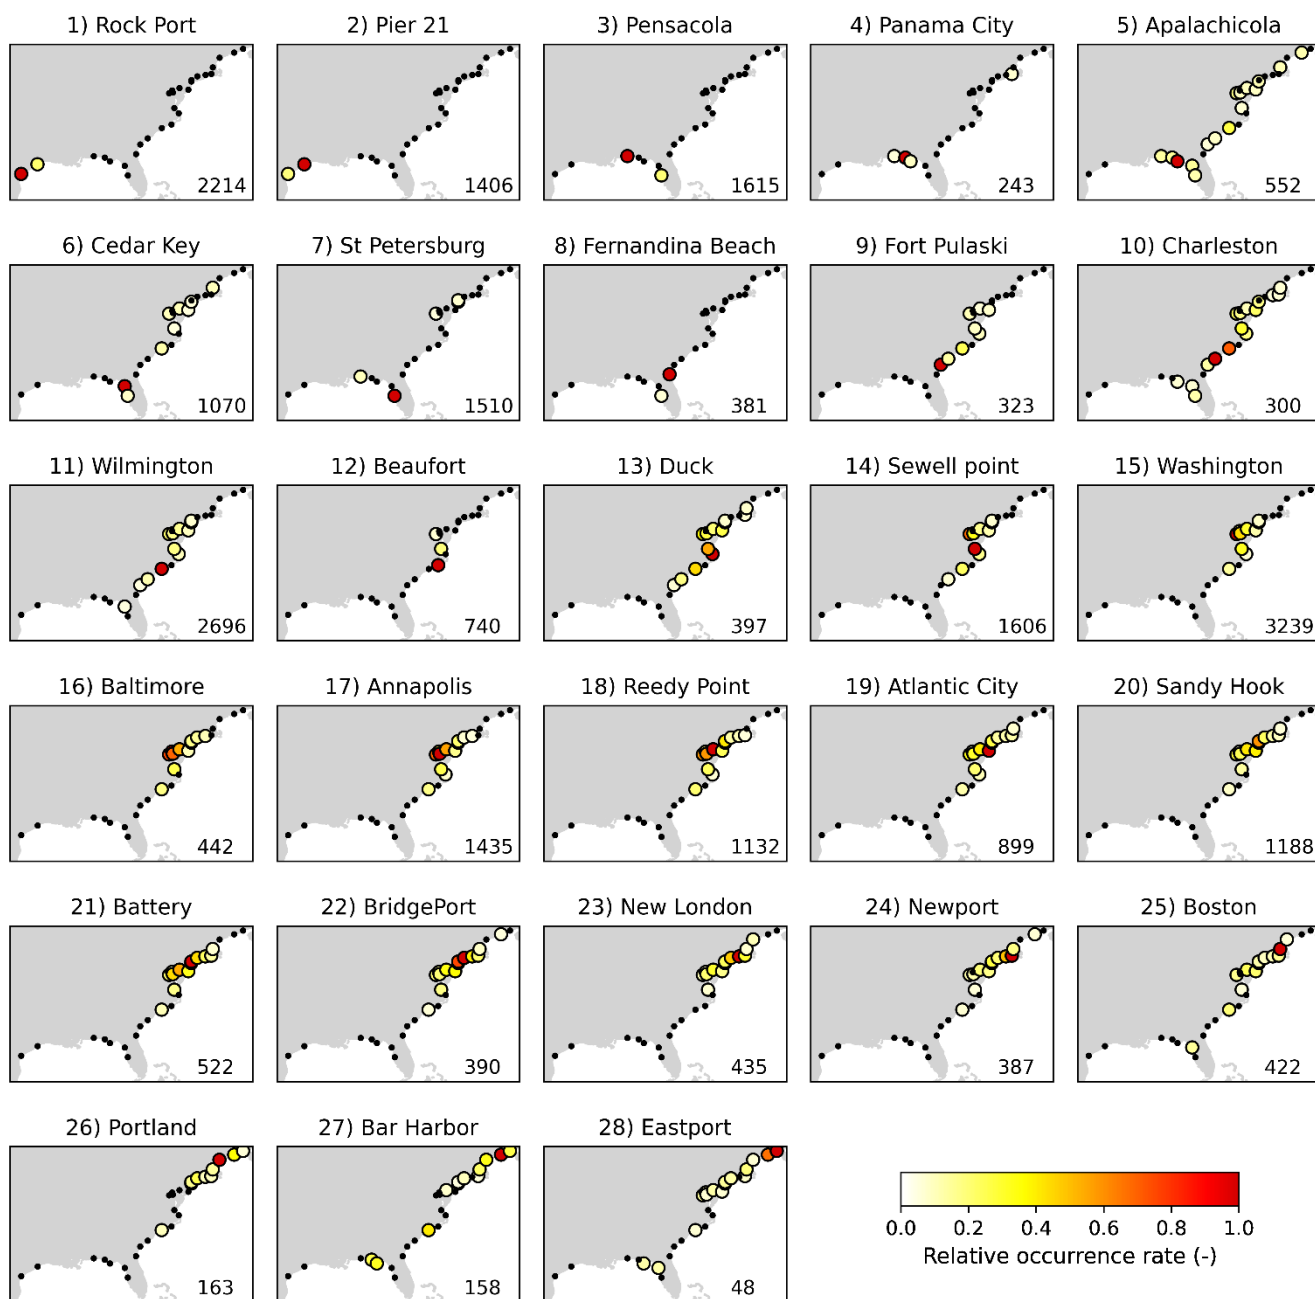

50 **Figure S6:** Joint occurrence rate of potential compound flooding at remaining locations given potential compound flooding occurs at a primary location for the Gulf and East coasts. Potential compound flooding is defined by events with both total water levels and river discharges exceeding the 1-year return level. Small black solid circles refer to the joint occurrence rate lower than 0.05.

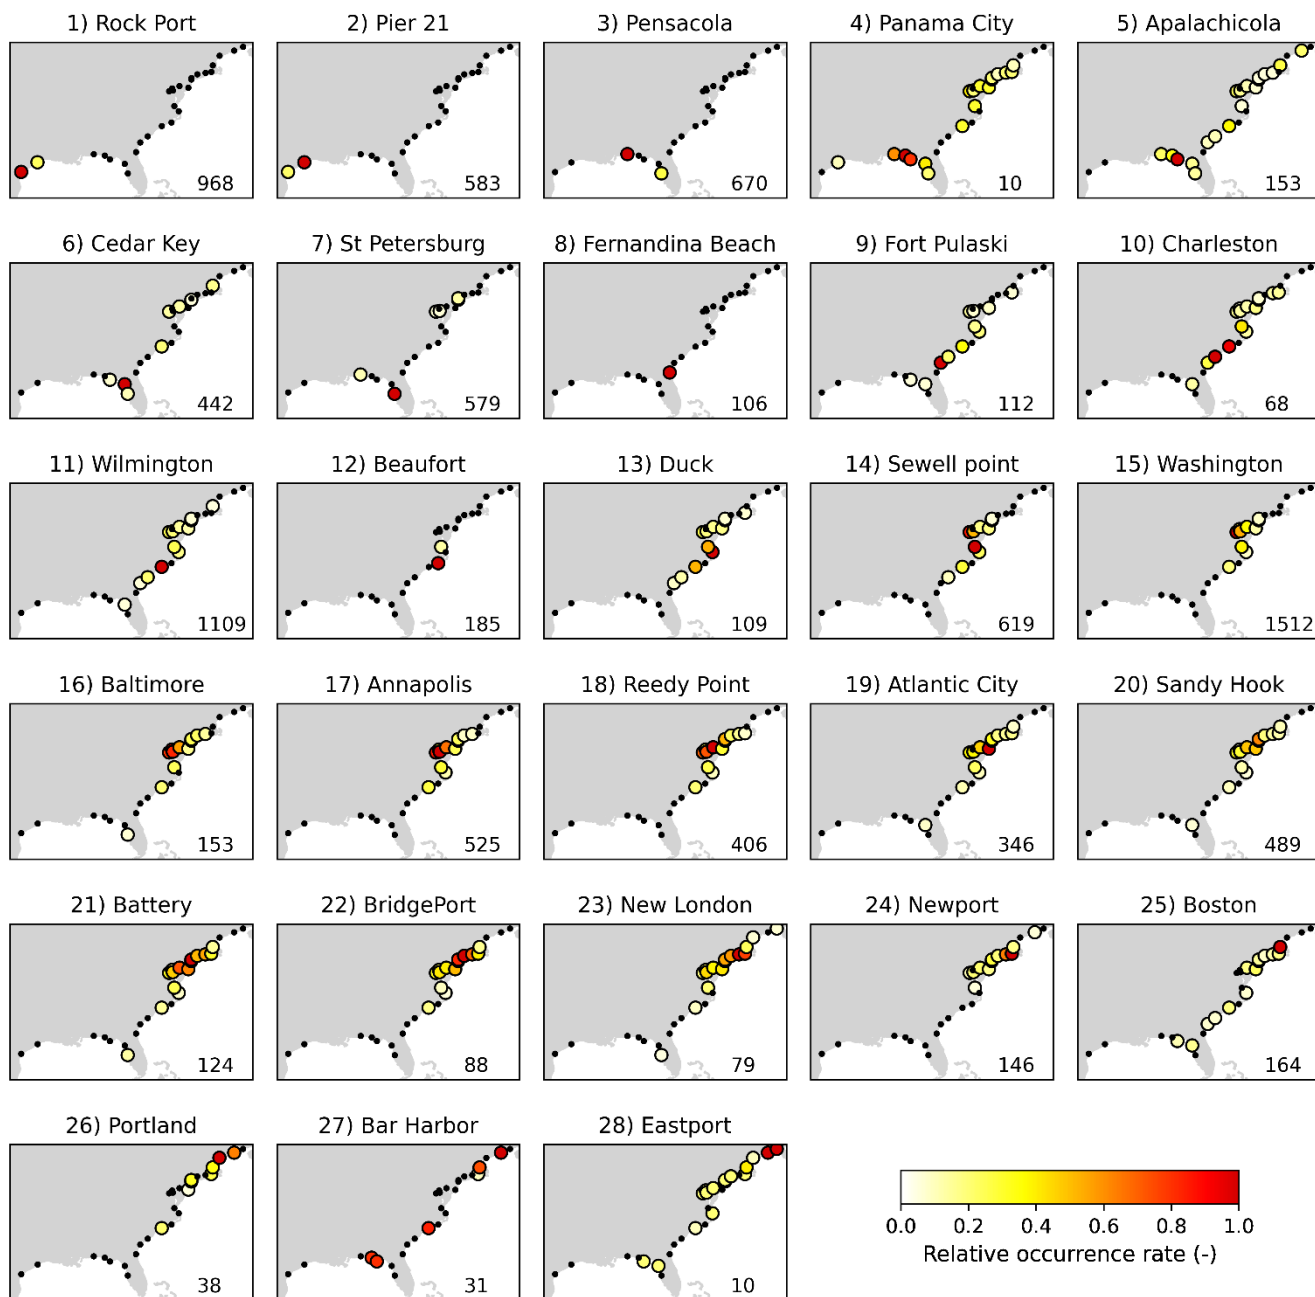

**Figure S7:** Joint occurrence rate of potential compound flooding at remaining locations given potential compound flooding occurs at a primary location for the Gulf and East coasts. Potential compound flooding is defined by events with both total water levels and river discharges exceeding the 2-year return level. Small black solid circles refer to the joint occurrence rate lower than 0.05.

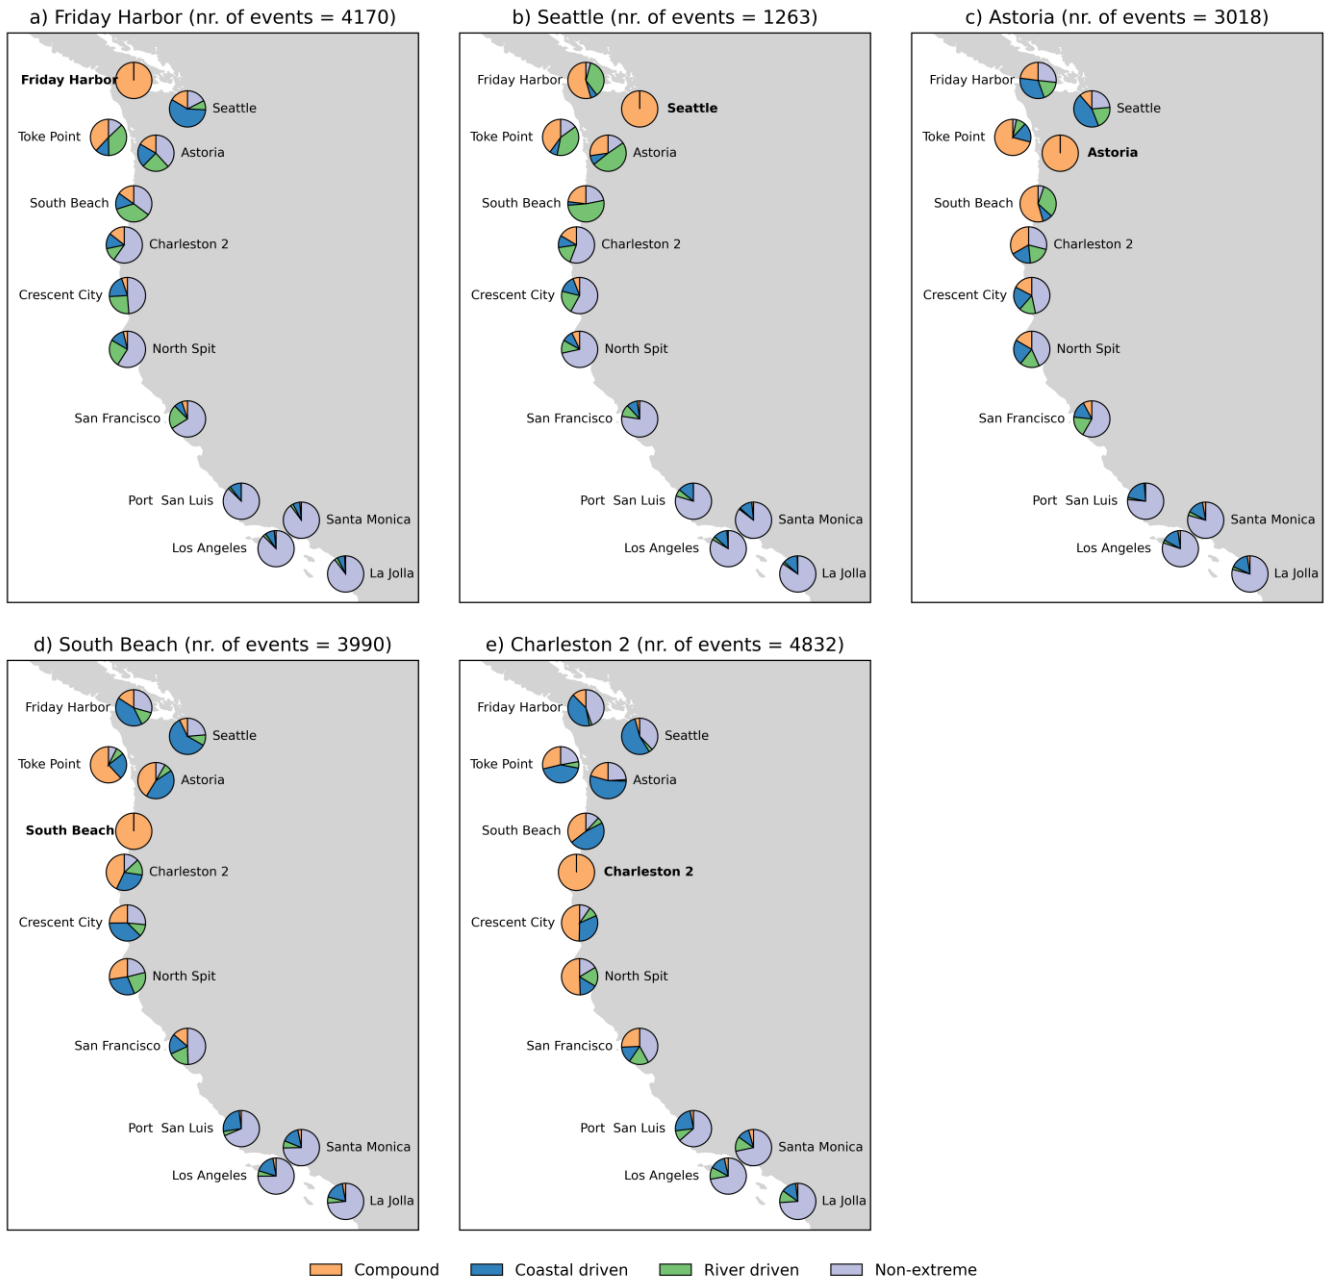

**Figure S8:** Relative frequency of different types of events given potential compound flooding occurs at a primary location for a) Friday Habor, b) Seattle, c) Astoria, d) South Beach, and e) Charleston on the U.S. West Coast. Potential compound flood event (orange) is defined for events with both total water levels and river discharges exceeding the 99<sup>th</sup> percentile. Blue refers to coastal driven events where only the total water level exceeds the 99<sup>th</sup> threshold, while green refers to river driven events where only the river discharge exceeds the 99<sup>th</sup> threshold. Purple refers to non-extreme events where none of the drivers exceed the threshold.

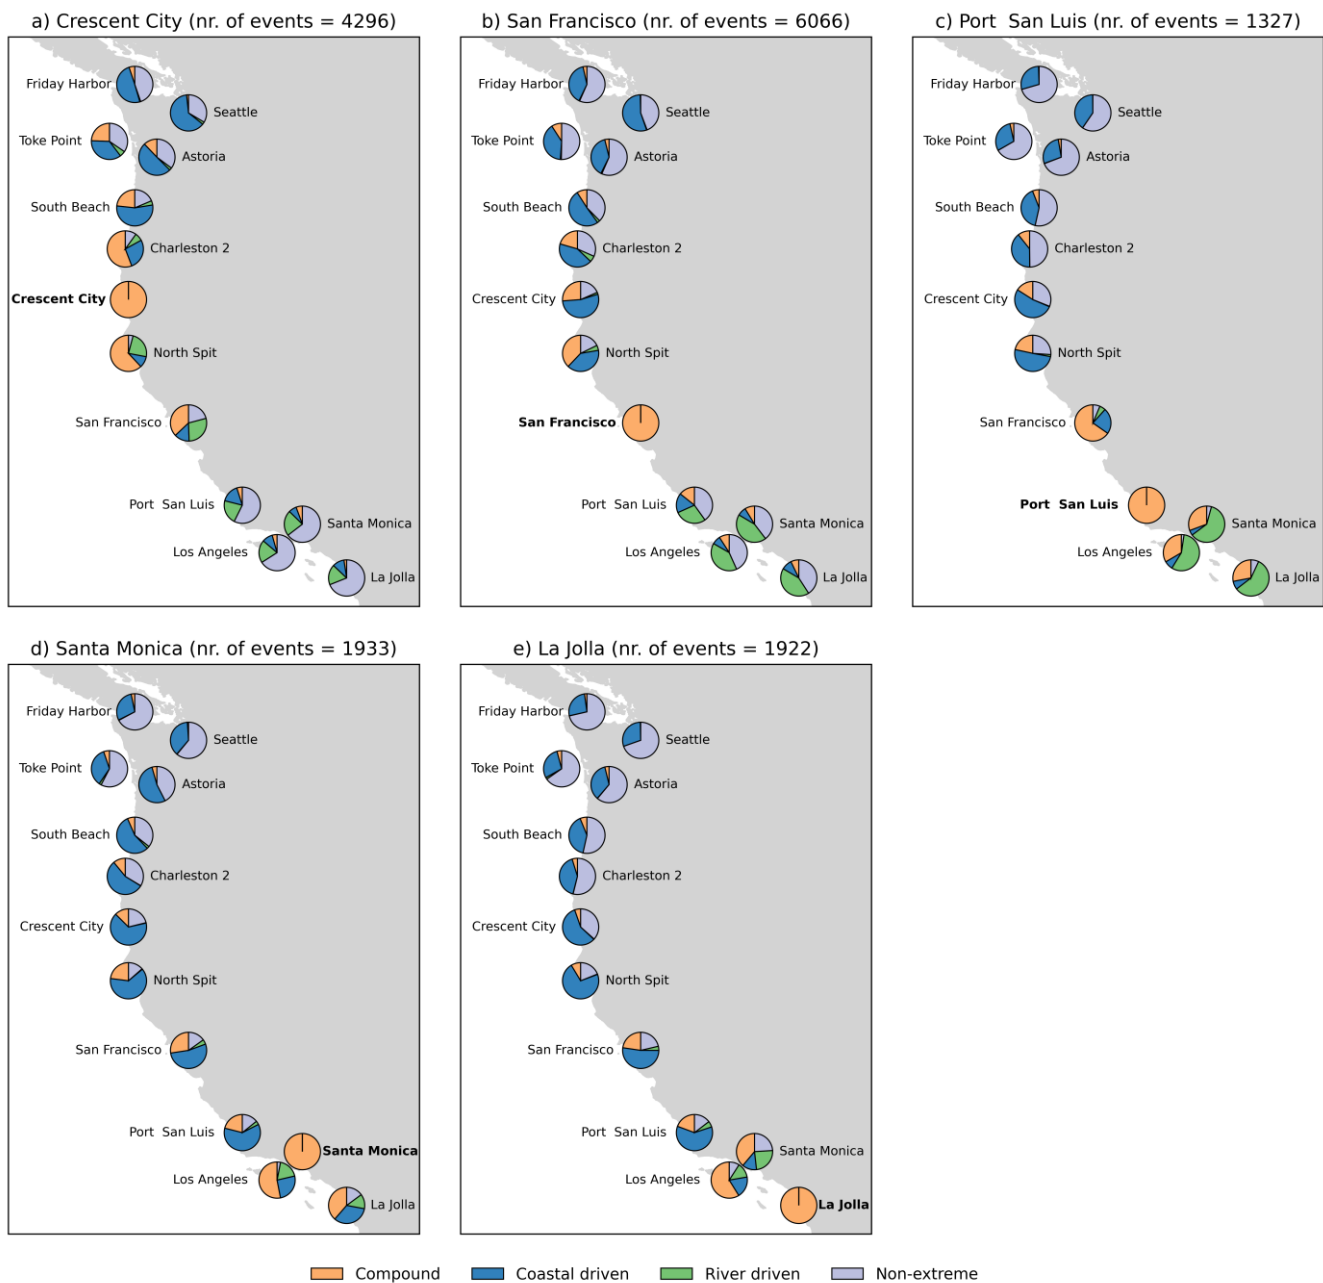

**Figure S9:** Relative frequency of different types of events given potential compound flooding occurs at a primary location for a) Crescent City, b) San Francisco, c) Port San Luis, d) Santa Monica, and e) La Jolla on the U.S. West Coast. Potential compound flood event (orange) is defined for events with both total water levels and river discharges exceeding the 99<sup>th</sup> percentile. Blue refers to coastal driven events where only the total water level exceeds the 99<sup>th</sup> threshold, while green refers to river driven events where only the river discharge exceeds the 99<sup>th</sup> threshold. Purple refers to non-extreme events where none of the drivers exceed the threshold.
